# Supplementary material
Source: publisher site journal article supplement (https://www.dovepress.com/article/590000)
Supplement: Supplementary file 1 [file 590000%20Revised%20Supplementary%20Materials.docx]

Supplementary material

**Supplementary table 1**: Definition and timing of measurement of selected predictors in Gen3G and Project Viva cohorts

| Predictors | Definition/diagnosis | | Timing | |
| --- | --- | --- | --- | --- |
| Gen3G | Project Viva | Gen3G | Project Viva |
| *Demographic factors* | | | | |
| Race and ethnicity | Self-reported | Self-reported | Baseline | Baseline |
| Age |
| Smoking status |
| Educational level | 3- and 5-year follow-up visits |
| *Medical history* | | | | |
| Positive familial history of type 2 diabetes | Self-reported | Self-reported | Baseline | 3- year follow-up visit |
| Previous polycystic ovarian syndrome | Based on diagnostic codes from medical records around the index pregnancy, or from self-reported at the 17-year follow-up visit | Baseline or at the 17-year follow-up visit |
| Previous GDM or macrosomia | - Self-reported - Includes only previous GDM, not previous macrosomia | Baseline |
| *Pre-gestational predictors* | | | | |
| Pre-gestational BMI | Self-reported pre-gestational weight (kg) divided by height (m) squared, as measured objectively | Self-reported pre-gestational weight (kg) divided by self-reported height (m) squared. | Baseline | Baseline |
| Parity | Number of previous pregnancies lasting more than 20 weeks | Number of previous pregnancies lasting more than 24 weeks |
| *Pregnancy-related predictors* | | | | |
| Chronic or gestational hypertension | Chronic hypertension: defined by the use of antihypertensive medications or corresponding to at least two elevated clinically measured blood pressure values before 20 weeks’ gestation  Gestational hypertension: defined by the SOGC guidelines as follow: at least two clinically measured high blood pressure values (SBP ≥140 mmHg and/or DBP ≥90 mmHg) after 20 weeks of gestation [1] | Chronic hypertension: defined by the use of antihypertensive medications or corresponding to at least two elevated clinically measured blood pressure values before 20 weeks’ gestation  Gestational hypertension: defined by the SOGC guidelines as follow: at least two clinically measured high blood pressure values (SBP ≥140 mmHg and/or DBP ≥90 mmHg) after 20 weeks of gestation [1] | Delivery | Delivery |
| Preeclampsia | Gestational hypertension with proteinuria after 20 weeks of pregnancy (protein to creatinine ratio > 0.03 g/mmol or ≥ 300 mg/day) | Gestational hypertension or chronic hypertension with proteinuria after 20 weeks of pregnancy (dipstick value of ≥2+ once or ≥1+ on 2 or more occasions >4 hours but ≤7 days apart) |
| GDM diagnosis | Some women with risk factors were screened for GDM (50g GCT and/or asked to do SMBG) before the universal testing at 24-28 weeks. If hyperglycemia was detected, women were referred to the diabetes in pregnancy clinic for treatment | Defined by the Carpenter and Coustan criteria using a non-fasting 50g-GCT followed by a fasting 100g-OGTT if abnormal results (1-hour plasma glucose≥7.8 mmol/L), with GDM diagnosed at the following thresholds: fasting plasma glucose>5.3 mmol/L and/or 1h plasma glucose>10.0 mmol/L and/or 2h plasma glucose>8.6 mmol/L and/or 3h plasma glucose>7.8 [2] | First trimester of pregnancy | Late second trimester of pregnancy (~28 weeks) |
| Defined by the IADPSG criteria using a 75g-OGTT with GDM diagnosed at the following thresholds: fasting plasma glucose≥5.1 mmol/L and/or 1h plasma glucose≥10.0 mmol/L and/or 2h plasma glucose≥8.5 mmol/L [3] | Late second trimester of pregnancy (~28 weeks) |
| GWG | Difference between the last measure of the weight during pregnancy and self-reported pre-gestational weight | Difference between the last measure of the weight during pregnancy and self-reported pre-gestational weight | Third trimester of pregnancy (within 8 weeks of delivery) | Third trimester of pregnancy (within 4 weeks of delivery) |
| *Adverse pregnancy outcomes* | | | | |
| Prematurity | Delivery before 37 weeks of gestation | Delivery before 37 weeks of gestation | Delivery | Delivery |
| Macrosomia | Birthweight ≥ 4000g | Birthweight ≥ 4000g |

Note: Abbreviations: BMI, body mass index; DBP, diastolic blood pressure; GCT, glucose challenge test; GDM, gestational diabetes mellitus; Gen3G, Genetics of Glucose regulation in Gestation and Growth cohort; GWG, gestational weight gain; IADPSG, International Association of the Diabetes and Pregnancy Study Groups; IOM, Institute of Medicine; OGTT, oral glucose tolerance test; SBP, systolic blood pressure; SOGC, Society of Obstetricians and Gynaecologists of Canada; SMBG, self-monitoring of blood glucose.

**Supplementary Table 2.** Tuning hyperparameters for the final random forest and LASSO regression models fitted using the entire Gen3G cohort

| Algorithm | Tuning hyperparameter | Description | Considered values | Tuned value |
| --- | --- | --- | --- | --- |
| Random foresta | ntree | Number of trees | {10, 100, 500, 1000, 1500} | 1000 |
| mtry | Number of candidate features considered at each node | {1, 2, 3, 4, 5, 6} | 3 |
| nodesize | Minimum number of observations in terminal nodes | {1, 2, 3, 4, 5, 6} | 5 |
| LASSOb | Lambda | Regularization strength | Sequence of 100 values automatically selected by the glmnet package in R | 0.0083 |

Note: aFull non-parametric machine learning algorithm and using all 15 candidate predictors. bReduced regression model using only the top four best predictors from the random forest model.

**Supplementary Table 3.** Characteristics of the study participants from the Gen3G (development and internal validation) and Project Viva (external validation) cohorts stratified by prediabetes/T2D development status

| Characteristic | | Gen3G  N (%), med [IQR] | | p-value* | Project Viva | | | | | |
| --- | --- | --- | --- | --- | --- | --- | --- | --- | --- | --- |
| **3-year follow-up visit**  **N (%), med [IQR]** | | **p-value*** | **17-year follow-up visit**  **N (%), med [IQR]** | | **p-value*** |
| No prediabetes/T2D (347) | Prediabetes/T2D (56) | No prediabetes/T2D (542) | Prediabetes/T2D (20) | No prediabetes/T2D (417) | Prediabetes/T2D (124) |
| *Demographic variables* | | | | | | | | | | |
| Ethnicity (Non-Hispanic White) | | 333 (96) | 54 (96) | 1.000 | 389 (71) | 7 (35) | **0.001** | 305 (73) | 59 (48) | **<0.001** |
| Age at first trimester (years) | | 28.9 [26.2; 31.9] | 30.6 [28.1; 32.8] | **0.01** | 34.4 [30.8; 36.9] | 35.7 [32.3; 39.4] | 0.08 | 32.6 [29.7; 35.9] | 33.0 [29.6; 36.6] | 0.60 |
| Active smoker at first trimester | | 24 (7) | 7 (13) | 0.17 | 57 (11) | 0 (0) | 0.25 | 35 (8) | 17 (14) | 0.11 |
| Educational level (University and more) | | 165 (48) | 23 (41) | 0.45 | 365 (67) | 13 (65) | 1.00 | 309 (74) | 81 (65) | 0.07 |
| *Medical history* | |  |  |  |  |  |  |  |  |  |
| Familial history of type 2 diabetes | | 64 (18) | 17 (30) | 0.06 | 117 (22) | 9 (45) | **0.03** | 74 (18) | 29 (23) | 0.20 |
| Previous diagnosis of PCOS | | 6 (2) | 2 (4) | 0.31 | 17 (3) | 1 (5) | 0.45 | 15 (4) | 14 (11) | **0.002** |
| Previous diagnosis of GDM or previous macrosomia | | 37 (11) | 12 (21) | **0.04** | 6 (1) | 1 (5) | 0.23 | 1 (<1) | 3 (2) | **0.04** |
| *Pre-gestational variables* | | | | | | | | | | |
| Pre-gestational BMI | | 23.0 [20.8; 26.4] | 26.8 [22.9; 32.7] | **<0.001** | 23.8 [21.3; 27.0] | 29.1 [24.3; 37.6] | **0.003** | 22.9 [20.8; 25.5] | 27.0 [22.8; 30.7] | **<0.001** |
| Nulliparous | | 165 (48) | 23 (41) | 0.45 | 159 (29) | 4 (20) | 0.51 | 203 (49) | 51 (41) | 0.17 |
| *Pregnancy variables* | | | | | | | | | | |
| Chronic hypertension or gestational hypertension | | 13 (4) | 7 (13) | **0.01** | 41 (8) | 3 (15) | 0.20 | 21 (5) | 14 (11) | **0.02** |
| Preeclampsia | | 12 (3) | 0 (0) | 0.39 | 19 (4) | 0 (0) | 1.00 | 7 (2) | 9 (7) | **0.004** |
| GDM categories | Level 0: no GDM (Gen3G)/Normal glycemia (Project Viva) | 320 (92) | 35 (63) | **<0.001** | 450 (83) | 13 (65) | 0.08 | 365 (88) | 92 (74) | **<0.001** |
| Level 1: not early GDM without insulin treatment (Gen3G)/Isolated hyperglycemia (Project Viva) | 19 (5) | 6 (11) | 50 (9) | 4 (20) | 32 (8) | 13 (11) |
| Level 2: not early GDM treated with insulin (Gen3G)/Intermediate glucose intolerance (Project Viva) | 7 (2) | 7 (13) | 22 (4) | 1 (5) | 16 (4) | 4 (3) |
| Level 3: Early GDM (Gen3G)/GDM (Project Viva) | 1 (<1) | 8 (14) | 20 (4) | 2 (10) | 4 (1) | 15 (12) |
| Gestational weight gain (kg) | | **3.3 [0.4; 7.0]** | **2.3 [0.2; 7.4]** | 0.46 | **4.1 [1.2; 7.7]** | **2.4 [-2.4; 4.9]** | **0.02** | **4.6 [0.9; 8.2]** | **4.0 [1.7; 8.2]** | 0.90 |
| *Adverse pregnancy outcomes* | | | | | | | | | | |
| Prematurity | | 9 (3) | 6 (11) | **0.01** | 37 (7) | 1 (5) | 1.00 | 19 (5) | 13 (11) | **0.03** |
| Macrosomia | | 41 (12) | 6 (11) | 0.99 | 100 (19) | 2 (10) | 0.55 | 77 (19) | 19 (15) | 0.50 |

Note: *Wilcoxon-Mann-Whitney test for continuous variables and Chi-square or Fisher’s exact test for categorical variables. Significant results with *p*-value > 0.05 are in bold. Abbreviations: BMI, body mass index; GDM, gestational diabetes mellitus; Gen3G, Genetics of Glucose regulation in Gestation and Growth; PCOS, polycystic ovary syndrome.

**Supplementary Table 4.** Performance of all models developed for predicting prediabetes/T2D development at five years after delivery in Gen3G (internal and developmental) using cross-validation, and at three years and seventeen years after delivery in Project Viva (external validation)

| Model | Gen3G | | | Project Viva | | | | | |
| --- | --- | --- | --- | --- | --- | --- | --- | --- | --- |
| **17-year follow-up visit** | | | **3-year follow-up visit** | | |
| Scaled_BS | AUC-ROC | PR-AUC | Scaled_BS | AUC-ROC | PR-AUC | Scaled_BS | AUC-ROC | PR-AUC |
| G4DP index |  |  |  | 0.084 | 0.682 | 0.442 | 0.017 | 0.707 | 0.125 |
| Random Foresta | 0.158  ±0.090 | 0.760 ±0.097 | 0.461 ±0.101 | 0.055 | 0.689 | 0.448 | -0.720 | 0.744 | 0.099 |
| LASSOb | 0.151 ±0.105 | 0.696 ±0.106 | 0.462 ±0.122 | 0.036 | 0.676 | 0.433 | -0.927 | 0.731 | 0.128 |

Note: aFull non-parametric machine learning algorithm and using all 15 candidate predictors. bReduced regression model using only the top four best predictors from the random forest model.

**Supplementary Figure 1:** Flowchart illustrating the selection of participants for the final samples used for model development (Gen3G) and validation (Project Viva).

Legend: aParticipants were excluded if the child’s age was out of the window of follow-up. Other reasons for not attending the 3 and/or 5-year follow-up visits are: unable to contact (outreached without answers, contact information not valid), never show up for the scheduled visit, participant declined this follow-up but agreed to be recontacted for future assessments. bIdentified through post-delivery self-reported questionnaires. Abbreviations: GDM, gestational diabetes mellitus; Gen3G, Genetics of glucose regulation in gestation and growth cohort; T1D, type 1 diabetes; T2D, type 2 diabetes.

**Supplementary Figure 2.** Variable’s importance measured by mean decreased Gini impurity index across 5-fold cross-validation for the full models.

Legend: Heatmap displays the mean decreased Gini impurity values for the 15 predictors across the five-fold of cross-validation. Color intensity reflects the relative importance of each variable within each fold, as measured by mean decreased Gini impurity (darker color indicates variables with higher importance). Abbreviations: BMI, body mass index; GDM, gestational diabetes mellitus; PCOS, polycystic ovarian syndrome; T2D, type 2 diabetes.

**Supplementary Table 5.** Regression coefficients of the final LASSO regression model for predicting prediabetes/T2D development five years after delivery, fitted using the entire Gen3G dataset

| Variable | Regression Coefficient |
| --- | --- |
| Intercept | -4.4008 |
| 4-level GDM | 1.0046 |
| Pre-gestational BMI | 0.0463 |
| Age | 0.0312 |
| Gestational weight gain | -0.0204 |

Note: Abbreviations: BMI, body mass index; GDM, gestational diabetes mellitus.

**Candidate predictors**

*Demographic and social factors*

Participating women reported their age, smoking status, race and ethnicity during the index pregnancy in both cohorts. In Project Viva, participants reported their educational level during the first trimester antenatal visit. Gen3G assessed maternal education at the 3-year and 5-year follow-up visits; we prioritized the response at the 3-year visit, or if unavailable (n=73), we used the response at the 5-year visit.

*Medical history*

For medical history, we considered a positive family history of T2D, a previous diagnosis of polycystic ovary syndrome (PCOS), and a previous diagnosis of either GDM or macrosomia antecedent to the index pregnancy (assessed jointly in the Gen3G questionnaire) as candidate predictors. Medical history in Gen3G was reported by the participant during the first trimester of pregnancy.

In the Project Viva dataset, we assessed family history of T2D at the 3-year follow-up visit. PCOS diagnosis was assessed from diagnosis codes in medical records around enrollment, or from self-reported at the 17-year follow-up visit. Additionally, participants reported previous GDM diagnosis (prior to the index pregnancy) at enrollment, but Project Viva did not inquire about previous macrosomia.

*Pre-gestational predictors*

We considered pre-gestational body mass index (BMI) and parity as pre-gestational predictors. We defined parity self-reported by the mother at enrollment as the number of previous pregnancies (lasting more than 20 weeks in Gen3G, more than 24 weeks in Project Viva).

*Pregnancy-related predictors*

We considered chronic or gestational hypertension, pre-eclampsia, GDM diagnosis, and gestational weight gain as pregnancy-related predictors.

Chronic or gestational hypertension and preeclampsia:

In both cohorts, chronic hypertension was defined by the use of antihypertensive medications or corresponding to at least two clinically measured high systolic and/or diastolic blood pressure values (SBP ³140 mmHg and/or DBP ³90 mmHg) before 20 weeks’ gestation. Gestational hypertension was defined by new onset hypertension from at least two clinically measured high systolic and/or diastolic blood pressure values after 20 weeks’ gestation [1]. In both cohort, preeclampsia was defined as hypertension with proteinuria after 20 weeks of pregnancy (Gen3G: protein to creatinine ratio > 0.03 g/mmol or ³ 300 mg/day [4]; Project Viva: dipstick value of ³2+ once or ³1+ on 2 or more occasions >4 hours but £7 days apart [5]).

*Adverse pregnancy outcomes during the index pregnancy*

We considered prematurity and macrosomia as adverse pregnancy outcomes, captured similarly in both Gen3G and Project Viva. We defined prematurity as delivery before 37 weeks of gestation [6], based on gestational age at delivery recorded in medical records. We defined macrosomia as a birthweight ≥4000g [7], assessed using birthweight data from medical records.

**Performance metrics**

We assessed overall model performance using the scaled Brier score which is calculated using the following formula:

Brier scorescaled = 1-

where N represents the total number of participants in the test set, represents probability that the participant *i* has prediabetes/T2D, represents the observed outcome for participant *i* (1 if the participant was classified in the prediabetes/T2D group, 0 otherwise), and represents the overall (marginal) observed probability for participant to developed prediabetes/T2D in the test set.

We assessed the ability of the model to discriminate between participants with and without prediabetes/T2D using two performance metrics: (1) the area under the receiver operating characteristic curve (ROC-AUC) and (2) the area under the precision-recall curve (PR-AUC). The ROC curve plots sensitivity (true positive rate) on the y-axis against 1 - specificity (false positive rate) on the x-axis, across all classification thresholds derived from the test set predictions [8]. The ROC-AUC ranges from 0 to 1.0, where values below 0.5 indicate that the model predictions are worse than chance and 1.0 indicates perfect ability to discriminates between participants with and without the outcome. Unlike the ROC curve, the PR curve focuses solely on performance of positive cases, plotting precision (positive predictive value) against recall (sensitivity) [9]. This performance metric is more informative in the context of unbalanced datasets (where one class is significantly more prevalent than the other) and evaluates how well the model can correctly identify positive cases while minimizing false positives. The PR-AUC ranges from 0 to 1.0, where values below the proportion of positive cases (*p*) in the test set indicate that the model predictions are worse than chance.

References

[1] Magee LA, Smith GN, Bloch C, et al. Guideline No. 426: Hypertensive Disorders of Pregnancy: Diagnosis, Prediction, Prevention, and Management. *Journal of Obstetrics and Gynaecology Canada* 2022; 44: 547-571.e1.

[2] Carpenter MW, Coustan DR. Criteria for screening tests for gestational diabetes. *American Journal of Obstetrics and Gynecology* 1982; 144: 768–773.

[3] International Association of Diabetes and Pregnancy Study Groups Consensus Panel, Metzger BE, Gabbe SG, et al. International association of diabetes and pregnancy study groups recommendations on the diagnosis and classification of hyperglycemia in pregnancy. *Diabetes Care* 2010; 33: 676–682.

[4] Magee LA, Pels A, Helewa M, et al. Diagnosis, Evaluation, and Management of the Hypertensive Disorders of Pregnancy: Executive Summary. *Journal of Obstetrics and Gynaecology Canada* 2014; 36: 416–438.

[5] Tripathi RR, Rifas‐Shiman SL, Hawley N, et al. Hypertensive Disorders of Pregnancy and Offspring Cardiometabolic Health at Midchildhood: Project Viva Findings. *Journal of the American Heart Association* 2018; 7: e007426.

[6] CDC. Preterm Birth. *Maternal Infant Health*, https://www.cdc.gov/maternal-infant-health/preterm-birth/index.html (2025, accessed 5 March 2025).

[7] Araujo Júnior E, Peixoto AB, Zamarian ACP, et al. Macrosomia. *Best Pract Res Clin Obstet Gynaecol* 2017; 38: 83–96.

[8] Nahm FS. Receiver operating characteristic curve: overview and practical use for clinicians. *Korean J Anesthesiol* 2022; 75: 25–36.

[9] Goadrich M, Oliphant L, Shavlik J. Gleaner: Creating ensembles of first-order clauses to improve recall-precision curves. *Mach Learn* 2006; 64: 231–261.
